# Supplementary material
Source: publisher figshare collection journal article supplement (https://acs.figshare.com/ndownloader/files/7234754)
Supplement: Supplementary file 1 [file 7234754]

## Supporting Information for

# Production of Levoglucosenone and Dihydrolevoglucosenone by Catalytic Reforming of Volatiles from Cellulose Pyrolysis Using Supported Ionic Liquid Phase

Shinji Kudo<sup>†,\*</sup>, Nozomi Goto<sup>†</sup>, Jonathan Sperry<sup>‡</sup>, Koyo Norinaga<sup>†</sup>, Jun-ichiro Hayashi<sup>†,§</sup>

<sup>†</sup> Institute for Materials Chemistry and Engineering, Kyushu University, 6-1 Kasuga Koen, Kasuga 816-8580, Japan

<sup>‡</sup> Center for Green Chemical Science, School of Chemical Sciences, The University of Auckland, 23 Symonds Street, Auckland, New Zealand

<sup>§</sup> Research and Education Center of Carbon Resources, Kyushu University, 6-1 Kasuga Koen, Kasuga 816-8580, Japan

\* Corresponding author. E-mail: shinji\_kudo@cm.kyushu-u.ac.jp. Phone/fax: +81 92 583 7793

## Table of Contents

|          |                                                                                                                   |
|----------|-------------------------------------------------------------------------------------------------------------------|
| Page S2: | Schematics of reaction systems for catalytic reforming of volatiles from cellulose pyrolysis ( <b>Figure S1</b> ) |
| Page S2: | TG curve of cellulose pyrolysis ( <b>Figure S2</b> )                                                              |
| Page S3: | TG curve of IL-B ( <b>Figure S3</b> )                                                                             |
| Page S3: | TG curves of IL-A recovered from fresh and spent IL-A/C ( <b>Figure S4</b> )                                      |
| Page S3: | <sup>13</sup> C NMR spectra of liquid products ( <b>Figure S5</b> )                                               |
| Page S4: | MS spectrum of DLGO ( <b>Figure S6</b> )                                                                          |



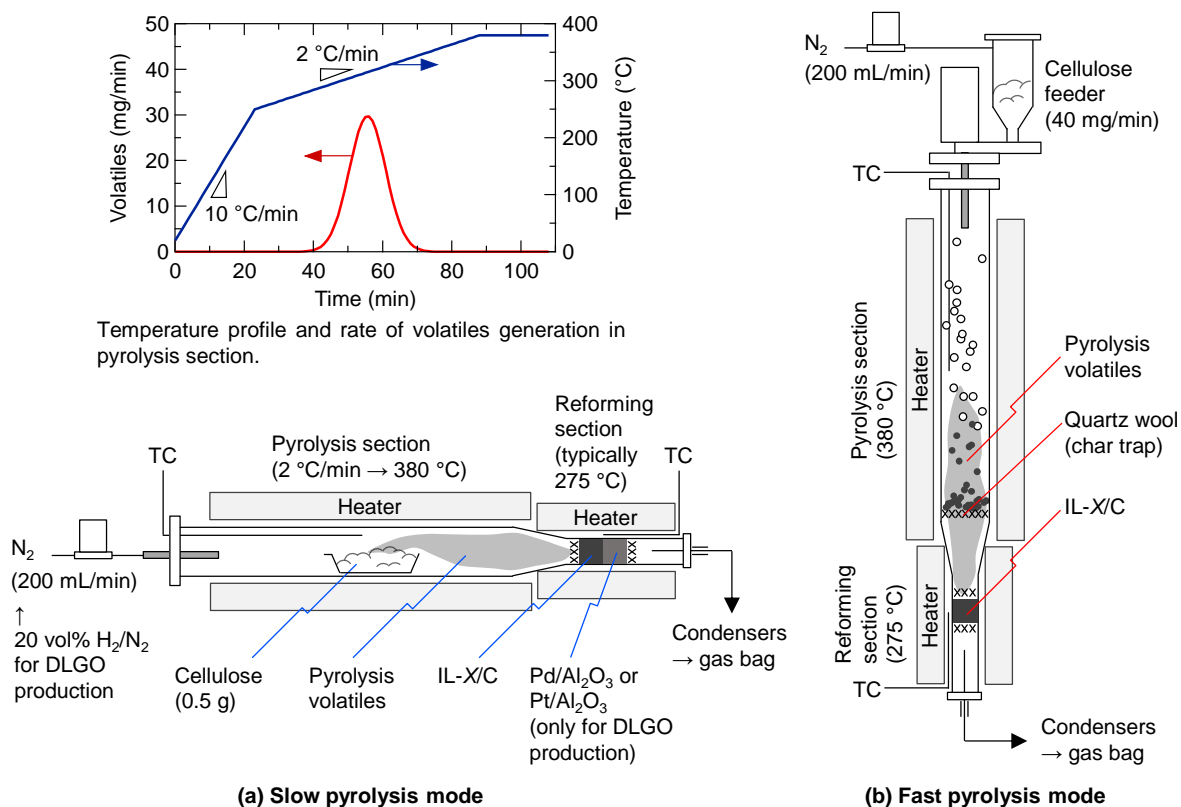

\* A quartz tube was used for both slow and fast pyrolysis modes. The inner diameters were 210 mm and 65 mm at pyrolysis and reforming sections, respectively.

**Figure S1.** Schematics of reaction systems for catalytic reforming of volatiles from cellulose pyrolysis: (a) slow pyrolysis mode and (b) fast pyrolysis mode.

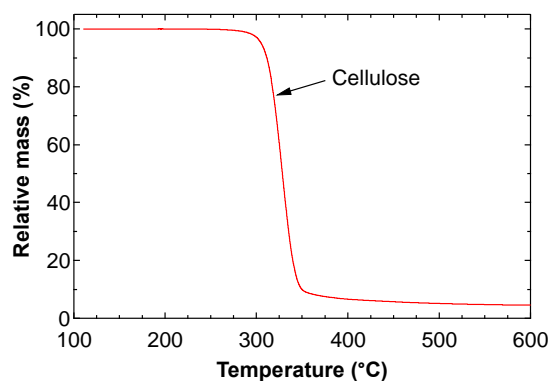

**Figure S2.** TG curve of cellulose pyrolysis: TGA under N<sub>2</sub> flow with 5 °C/min heating rate.



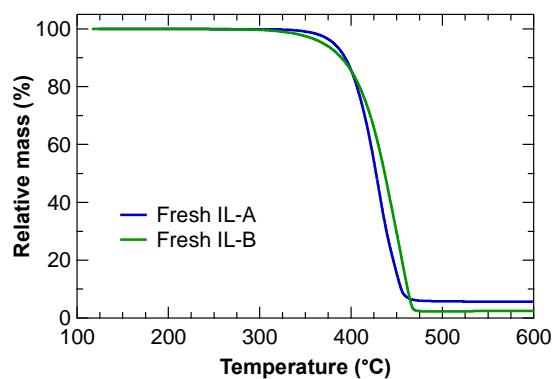

**Figure S3.** Comparison of TG curves between IL-A and IL-B: TGA under N<sub>2</sub> flow with 5 °C/min heating rate.

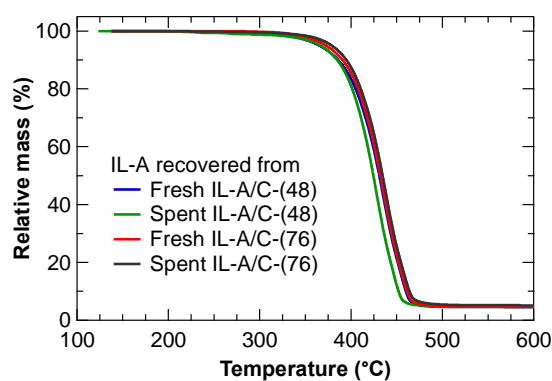

**Figure S4.** TG curves of IL-A recovered from fresh and spent IL-A/C: TGA under N<sub>2</sub> flow with 5 °C/min heating rate.

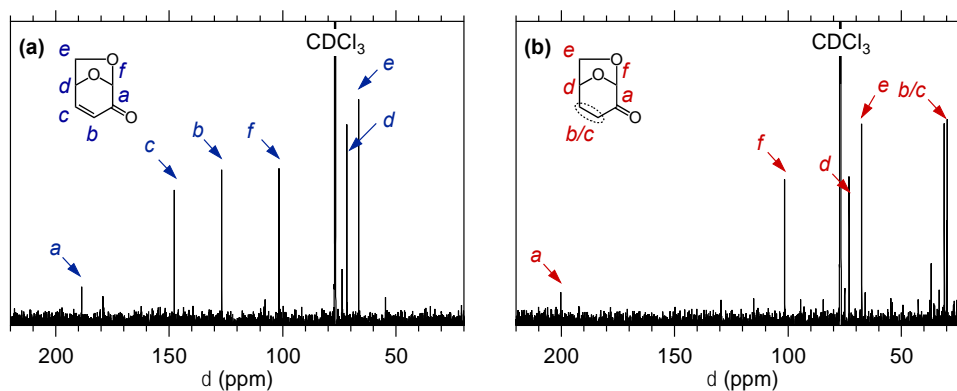

**Figure S5.** <sup>13</sup>C NMR spectrum of liquid product (CDCl<sub>3</sub> soluble portion) from (a) entry 2 and (b) entry 15. The spectrum in (b) is consistent with that of DLGO reported in the work by Sherwood et al. (*Chem. Commun.* **2014**, 50, 9650–9652).



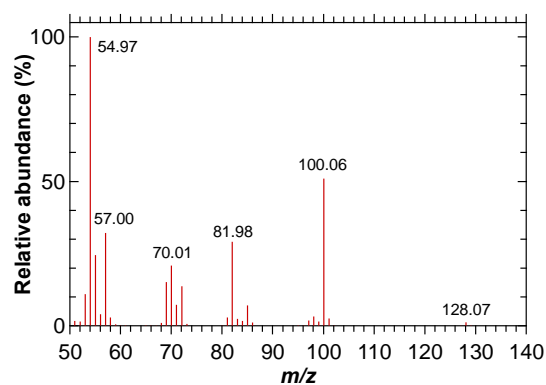

**Figure S6.** MS spectrum of the main peak of GC-MS chromatogram (c) in **Figure 2** at 32.0 min, which corresponds to DLGO.
